# Supplementary material
Source: publisher site journal article supplement (https://www.dovepress.com/article/166790)
Supplement: Supplementary file 1 [file get_supplementary_file.php]

Supplementary Table S1. Distribution of Participating Hospitals Reporting ESBL Results for different AST systems

| AST <sup>a</sup><br>System | Participating<br>Hospitals <sup>b</sup> |         | Reported ESBL<br>Results <sup>c</sup> |        | Reported Correct<br>ESBL Results <sup>d</sup> |        |
|----------------------------|-----------------------------------------|---------|---------------------------------------|--------|-----------------------------------------------|--------|
|                            | No.                                     | %       | No.                                   | %      | No.                                           | %      |
| DL                         | 130                                     | 15.30%  | 122                                   | 93.80% | 118                                           | 96.70% |
| Microscan                  | 133                                     | 15.60%  | 127                                   | 95.50% | 126                                           | 99.20% |
| Phoenix                    | 146                                     | 17.20%  | 122                                   | 83.60% | 113                                           | 92.60% |
| TDR                        | 50                                      | 5.90%   | 9                                     | 18.00% | 6                                             | 66.70% |
| Vitek 2                    | 392                                     | 46.10%  | 296                                   | 75.50% | 295                                           | 99.70% |
| Total                      | 851                                     | 100.00% | 676                                   | 79.40% | 658                                           | 97.30% |

<sup>a</sup>AST, Automated antibiotic susceptibility test system.

<sup>b</sup>Number (%) of hospitals using a particular automated AST system.

<sup>c</sup>Number (%) of hospitals reporting ESBL results for each automated AST system.

<sup>d</sup>Number (%) of hospitals which reported correct ESBL results for each automated AST system.

Supplementary Table S2. Antimicrobial Susceptibility Results of 3 Quality Control Strains Reported by Five Automated Systems in 780 Hospitals.

| System    | Reported QC <sup>a</sup> |                | Failed QC <sup>c</sup> |                |
|-----------|--------------------------|----------------|------------------------|----------------|
|           | No.                      | % <sup>b</sup> | No.                    | % <sup>d</sup> |
| DL        | 228                      | 14.40%         | 22                     | 9.60%          |
| Microscan | 253                      | 16.00%         | 33                     | 13.00%         |
| Phoenix   | 273                      | 17.30%         | 28                     | 10.30%         |
| TDR       | 69                       | 4.40%          | 6                      | 8.70%          |
| Vitek 2   | 758                      | 47.90%         | 76                     | 10.00%         |
| Total     | 1581                     | 100.00%        | 165                    | 10.40%         |

<sup>a</sup>Number of total susceptibility results of 3 quality control strains reported by the 5 automated systems.

<sup>b</sup>Percentage of the total number of susceptibility results by the 5 automated systems.

<sup>c</sup>Number of results outside the expected MIC range for the 3 quality control strains by the 5 automated systems as per the CLSI 2017 breakpoints.

<sup>d</sup>Percentage of the number of susceptibility results outside the expected MIC range by the 5 automated systems as per the CLSI 2017 breakpoints.

Supplementary Table S3. Susceptibility Results of Quality Control Strains for each Antibiotic Reported by Five Automated Systems in Total as Interpreted by CLSI 2017.

| Abx | Total <sup>a</sup> | MIC outside Reference Range <sup>b</sup> |      | Susceptibility Category Not Determinable <sup>c</sup> |       | MIC within Reference Range <sup>d</sup> |       |
|-----|--------------------|------------------------------------------|------|-------------------------------------------------------|-------|-----------------------------------------|-------|
|     |                    | No.                                      | %    | No.                                                   | %     | No.                                     | %     |
| SXT | 1431               | 52                                       | 3.6% | 741                                                   | 51.8% | 638                                     | 44.6% |
| FEP | 1431               | 51                                       | 3.6% | 1250                                                  | 87.4% | 130                                     | 9.1%  |
| LVX | 1431               | 48                                       | 3.4% | 1001                                                  | 70.0% | 382                                     | 26.7% |
| CIP | 1431               | 46                                       | 3.2% | 1270                                                  | 88.7% | 115                                     | 8.0%  |
| CAZ | 1431               | 38                                       | 2.7% | 1032                                                  | 72.1% | 361                                     | 25.2% |
| AMK | 1431               | 34                                       | 2.4% | 1333                                                  | 93.2% | 64                                      | 4.5%  |
| ATM | 1581               | 35                                       | 2.2% | 913                                                   | 57.7% | 633                                     | 40.0% |
| MEM | 1431               | 30                                       | 2.1% | 960                                                   | 67.1% | 441                                     | 30.8% |
| TZP | 1581               | 32                                       | 2.0% | 1440                                                  | 91.1% | 109                                     | 6.9%  |
| CRO | 1431               | 28                                       | 2.0% | 686                                                   | 47.9% | 717                                     | 50.1% |
| GEN | 1431               | 27                                       | 1.9% | 1361                                                  | 95.1% | 43                                      | 3.0%  |
| IPM | 1431               | 26                                       | 1.8% | 859                                                   | 60.0% | 546                                     | 38.2% |
| PIP | 1581               | 23                                       | 1.5% | 664                                                   | 42.0% | 894                                     | 56.5% |
| TOB | 1431               | 18                                       | 1.3% | 951                                                   | 66.5% | 462                                     | 32.3% |
| AMP | 928                | 11                                       | 1.2% | 528                                                   | 56.9% | 389                                     | 41.9% |
| CXM | 778                | 8                                        | 1.0% | 247                                                   | 31.7% | 523                                     | 67.2% |
| CZO | 778                | 8                                        | 1.0% | 703                                                   | 90.4% | 67                                      | 8.6%  |
| ETP | 1431               | 14                                       | 1.0% | 474                                                   | 33.1% | 943                                     | 65.9% |
| CTT | 778                | 7                                        | 0.9% | 277                                                   | 35.6% | 494                                     | 63.5% |
| NIT | 778                | 7                                        | 0.9% | 403                                                   | 51.8% | 368                                     | 47.3% |
| SAM | 928                | 7                                        | 0.8% | 386                                                   | 41.6% | 535                                     | 57.7% |
| AMC | 928                | 2                                        | 0.2% | 182                                                   | 19.6% | 744                                     | 80.2% |

Abx: antibiotic, AMP: ampicillin, PIP: piperacillin, AMC: amoxicillin/clavulanic acid, SAM: ampicillin/sulbactam, TZP: piperacillin/tazobactam, CZO: cefazolin, CXM: cefuroxime, CAZ: ceftazidime, CRO: ceftriaxone, FEP: cefepime, CTT: cefotetan, ATM: aztreonam, ETP: ertapenem, IPM: imipenem, MEM: meropenem, AMK: amikacin, GEN: gentamicin, TOB: tobramycin, CIP: ciprofloxacin, LVX: levofloxacin, SXT: trimethoprim/sulfamethoxazole, NIT: nitrofurantoin.

<sup>a</sup>Total number of individual susceptibility results of 3 ATCC strains reported by 5 automated systems.

<sup>b</sup>MIC outside reference range (failed QC).

<sup>c</sup>Susceptibility category not determinable when interpreted using CLSI 2017 document.

<sup>d</sup>MIC within reference range (passed QC).

Supplementary Table S4. Susceptibility Results of Quality Control Strains for Each Antibiotic Reported by DL System as Interpreted by CLSI 2017.

| Abx | Total <sup>a</sup> | MIC outside Reference Range <sup>b</sup> |             | Susceptibility Category Not Determinable <sup>c</sup> |              | MIC within Reference Range <sup>d</sup> |       |
|-----|--------------------|------------------------------------------|-------------|-------------------------------------------------------|--------------|-----------------------------------------|-------|
|     |                    | No.                                      | %           | No.                                                   | %            | No.                                     | %     |
| FEP | 221                | 8                                        | <b>3.6%</b> | 193                                                   | 87.3%        | 20                                      | 9.0%  |
| LVX | 221                | 7                                        | <b>3.2%</b> | 160                                                   | 72.4%        | 54                                      | 24.4% |
| CIP | 221                | 6                                        | <b>2.7%</b> | 195                                                   | 88.2%        | 20                                      | 9.0%  |
| SXT | 221                | 5                                        | <b>2.3%</b> | 127                                                   | 57.5%        | 89                                      | 40.3% |
| ATM | 228                | 5                                        | <b>2.2%</b> | 137                                                   | 60.1%        | 86                                      | 37.7% |
| CRO | 221                | 4                                        | <b>1.8%</b> | 111                                                   | 50.2%        | 106                                     | 48.0% |
| IPM | 221                | 4                                        | <b>1.8%</b> | 132                                                   | 59.7%        | 85                                      | 38.5% |
| CAZ | 221                | 4                                        | <b>1.8%</b> | 157                                                   | 71.0%        | 60                                      | 27.1% |
| AMK | 221                | 3                                        | 1.4%        | 209                                                   | <b>94.6%</b> | 9                                       | 4.1%  |
| PIP | 228                | 2                                        | 0.9%        | 110                                                   | 48.2%        | 116                                     | 50.9% |
| TZP | 228                | 2                                        | 0.9%        | 212                                                   | <b>93.0%</b> | 14                                      | 6.1%  |
| CXM | 119                | 1                                        | 0.8%        | 43                                                    | 36.1%        | 75                                      | 63.0% |
| SAM | 126                | 1                                        | 0.8%        | 56                                                    | 44.4%        | 69                                      | 54.8% |
| MEM | 221                | 1                                        | 0.5%        | 160                                                   | 72.4%        | 60                                      | 27.1% |
| GEN | 221                | 1                                        | 0.5%        | 215                                                   | <b>97.3%</b> | 5                                       | 2.3%  |
| AMC | 126                | 0                                        | 0.0%        | 25                                                    | 19.8%        | 101                                     | 80.2% |
| AMP | 126                | 0                                        | 0.0%        | 69                                                    | 54.8%        | 57                                      | 45.2% |
| NIT | 119                | 0                                        | 0.0%        | 67                                                    | 56.3%        | 52                                      | 43.7% |
| CZO | 119                | 0                                        | 0.0%        | 113                                                   | <b>95.0%</b> | 6                                       | 5.0%  |

Abx: antibiotic, AMP: ampicillin, PIP: piperacillin, AMC: amoxicillin/clavulanic acid, SAM: ampicillin/sulbactam, TZP: piperacillin/tazobactam, CZO: cefazolin, CXM: cefuroxime, CAZ: ceftazidime, CRO: ceftriaxone, FEP: cefepime, CTT: cefotetan, ATM: aztreonam, ETP: ertapenem, IPM: imipenem, MEM: meropenem, AMK: amikacin, GEN: gentamicin, TOB: tobramycin, CIP: ciprofloxacin, LVX: levofloxacin, SXT: trimethoprim/sulfamethoxazole, NIT: nitrofurantoin

<sup>a</sup>Total number of individual susceptibility results of 3 ATCC strains reported by DL system.

<sup>b</sup>MIC outside reference range (failed QC).

<sup>c</sup>Susceptibility category not determinable when interpreted using CLSI 2017 document.

<sup>d</sup>MIC within reference range (passed QC).

Supplementary Table S5. Susceptibility Results of Quality Control Strains for Each Antibiotic Reported by Vitek 2 as Interpreted by CLSI 2017.

| Abx | Total <sup>a</sup> | MIC outside Reference Range <sup>b</sup> |             | Susceptibility Category Not Determinable <sup>c</sup> |              | MIC within Reference Range <sup>d</sup> |       |
|-----|--------------------|------------------------------------------|-------------|-------------------------------------------------------|--------------|-----------------------------------------|-------|
|     |                    | No.                                      | %           | No.                                                   | %            | No.                                     | %     |
| SXT | 637                | 25                                       | <b>3.9%</b> | 311                                                   | 48.8%        | 301                                     | 47.3% |
| LVX | 637                | 24                                       | <b>3.8%</b> | 434                                                   | 68.1%        | 179                                     | 28.1% |
| FEP | 637                | 23                                       | <b>3.6%</b> | 549                                                   | <b>86.2%</b> | 65                                      | 10.2% |
| CIP | 637                | 23                                       | <b>3.6%</b> | 565                                                   | <b>88.7%</b> | 49                                      | 7.7%  |
| AMK | 637                | 20                                       | <b>3.1%</b> | 588                                                   | <b>92.3%</b> | 29                                      | 4.6%  |
| CAZ | 637                | 18                                       | <b>2.8%</b> | 458                                                   | 71.9%        | 161                                     | 25.3% |
| MEM | 637                | 16                                       | <b>2.5%</b> | 403                                                   | 63.3%        | 218                                     | 34.2% |
| GEN | 637                | 16                                       | <b>2.5%</b> | 602                                                   | <b>94.5%</b> | 19                                      | 3.0%  |
| CRO | 637                | 15                                       | <b>2.4%</b> | 293                                                   | 46.0%        | 329                                     | 51.6% |
| AMP | 473                | 11                                       | <b>2.3%</b> | 276                                                   | 58.4%        | 186                                     | 39.3% |
| TZP | 758                | 17                                       | <b>2.2%</b> | 684                                                   | <b>90.2%</b> | 57                                      | 7.5%  |
| ATM | 758                | 16                                       | <b>2.1%</b> | 413                                                   | 54.5%        | 329                                     | 43.4% |
| IPM | 637                | 12                                       | 1.9%        | 383                                                   | 60.1%        | 242                                     | 38.0% |
| PIP | 758                | 13                                       | 1.7%        | 279                                                   | 36.8%        | 466                                     | 61.5% |
| CXM | 352                | 5                                        | 1.4%        | 97                                                    | 27.6%        | 250                                     | 71.0% |
| NIT | 352                | 5                                        | 1.4%        | 188                                                   | 53.4%        | 159                                     | 45.2% |
| CZO | 352                | 5                                        | 1.4%        | 316                                                   | <b>89.8%</b> | 31                                      | 8.8%  |
| TOB | 637                | 9                                        | 1.4%        | 414                                                   | 65.0%        | 214                                     | 33.6% |
| SAM | 473                | 6                                        | 1.3%        | 202                                                   | 42.7%        | 265                                     | 56.0% |
| ETP | 637                | 5                                        | 0.8%        | 218                                                   | 34.2%        | 414                                     | 65.0% |
| AMC | 473                | 2                                        | 0.4%        | 77                                                    | 16.3%        | 394                                     | 83.3% |
| CTT | 352                | 1                                        | 0.3%        | 125                                                   | 35.5%        | 226                                     | 64.2% |

Abx: antibiotic, AMP: ampicillin, PIP: piperacillin, AMC: amoxicillin/clavulanic acid, SAM: ampicillin/sulbactam, TZP: piperacillin/tazobactam, CZO: cefazolin, CXM: cefuroxime, CAZ: ceftazidime, CRO: ceftriaxone, FEP: cefepime, CTT: cefotetan, ATM: aztreonam, ETP: ertapenem, IPM: imipenem, MEM: meropenem, AMK: amikacin, GEN: gentamicin, TOB: tobramycin, CIP: ciprofloxacin, LVX: levofloxacin, SXT: trimethoprim/sulfamethoxazole, NIT: nitrofurantoin

<sup>a</sup>Total number of individual susceptibility results of 3 ATCC strains reported by Vitek 2 system.

<sup>b</sup>MIC outside reference range (failed QC).

<sup>c</sup>Susceptibility category not determinable when interpreted using CLSI 2017 document.

<sup>d</sup>MIC within reference range (passed QC).

Supplementary Table S6. Susceptibility Results of Quality Control Strains for Each Antibiotic Reported by TDR System as Interpreted by CLSI 2017.

| Abx | Total <sup>a</sup> | MIC outside Reference Range <sup>b</sup> |             | Susceptibility Category Not Determinable <sup>c</sup> |              | MIC within Reference Range <sup>d</sup> |       |
|-----|--------------------|------------------------------------------|-------------|-------------------------------------------------------|--------------|-----------------------------------------|-------|
|     |                    | No.                                      | %           | No.                                                   | %            | No.                                     | %     |
| FEP | 68                 | 2                                        | <b>2.9%</b> | 61                                                    | <b>89.7%</b> | 5                                       | 7.4%  |
| CZO | 41                 | 1                                        | <b>2.4%</b> | 36                                                    | <b>87.8%</b> | 4                                       | 9.8%  |
| SXT | 68                 | 1                                        | <b>1.5%</b> | 42                                                    | 61.8%        | 25                                      | 36.8% |
| LVX | 68                 | 1                                        | <b>1.5%</b> | 49                                                    | 72.1%        | 18                                      | 26.5% |
| CIP | 68                 | 1                                        | <b>1.5%</b> | 64                                                    | <b>94.1%</b> | 3                                       | 4.4%  |
| ATM | 69                 | 1                                        | <b>1.4%</b> | 45                                                    | 65.2%        | 23                                      | 33.3% |
| SAM | 42                 | 0                                        | 0.0%        | 14                                                    | 33.3%        | 28                                      | 66.7% |
| CXM | 41                 | 0                                        | 0.0%        | 16                                                    | 39.0%        | 25                                      | 61.0% |
| PIP | 69                 | 0                                        | 0.0%        | 36                                                    | 52.2%        | 33                                      | 47.8% |
| AMP | 42                 | 0                                        | 0.0%        | 23                                                    | 54.8%        | 19                                      | 45.2% |
| CRO | 68                 | 0                                        | 0.0%        | 39                                                    | 57.4%        | 29                                      | 42.6% |
| MEM | 68                 | 0                                        | 0.0%        | 47                                                    | 69.1%        | 21                                      | 30.9% |
| TOB | 68                 | 0                                        | 0.0%        | 48                                                    | 70.6%        | 20                                      | 29.4% |
| CAZ | 68                 | 0                                        | 0.0%        | 52                                                    | 76.5%        | 16                                      | 23.5% |
| TZP | 69                 | 0                                        | 0.0%        | 65                                                    | <b>94.2%</b> | 4                                       | 5.8%  |
| AMK | 68                 | 0                                        | 0.0%        | 67                                                    | <b>98.5%</b> | 1                                       | 1.5%  |
| GEN | 68                 | 0                                        | 0.0%        | 67                                                    | <b>98.5%</b> | 1                                       | 1.5%  |

Abx: antibiotic, AMP: ampicillin, PIP: piperacillin, AMC: amoxicillin/clavulanic acid, SAM: ampicillin/sulbactam, TZP: piperacillin/tazobactam, CZO: cefazolin, CXM: cefuroxime, CAZ: ceftazidime, CRO: ceftriaxone, FEP: cefepime, CTT: cefotetan, ATM: aztreonam, ETP: ertapenem, IPM: imipenem, MEM: meropenem, AMK: amikacin, GEN: gentamicin, TOB: tobramycin, CIP: ciprofloxacin, LVX: levofloxacin, SXT: trimethoprim/sulfamethoxazole, NIT: nitrofurantoin

<sup>a</sup>Total number of individual susceptibility results of 3 ATCC strains reported by TDR system.

<sup>b</sup>MIC outside reference range (failed QC).

<sup>c</sup>Susceptibility category not determinable when interpreted using CLSI 2017 document.

<sup>d</sup>MIC within reference range (passed QC).

Supplementary Table S7. Susceptibility Results of Quality Control Strains for Each Antibiotic Reported by Microscan System as Interpreted by CLSI 2017.

| Abx | Total <sup>a</sup> | MIC outside Reference Range <sup>b</sup> |             | Susceptibility Category Not Determinable <sup>c</sup> |              | MIC within Reference Range <sup>d</sup> |       |
|-----|--------------------|------------------------------------------|-------------|-------------------------------------------------------|--------------|-----------------------------------------|-------|
|     |                    | No.                                      | %           | No.                                                   | %            | No.                                     | %     |
| SXT | 244                | 15                                       | <b>6.1%</b> | 129                                                   | 52.9%        | 100                                     | 41.0% |
| FEP | 244                | 11                                       | <b>4.5%</b> | 209                                                   | <b>85.7%</b> | 24                                      | 9.8%  |
| CIP | 244                | 11                                       | <b>4.5%</b> | 209                                                   | <b>85.7%</b> | 24                                      | 9.8%  |
| CAZ | 244                | 10                                       | <b>4.1%</b> | 168                                                   | 68.9%        | 66                                      | 27.0% |
| LVX | 244                | 10                                       | <b>4.1%</b> | 172                                                   | 70.5%        | 62                                      | 25.4% |
| MEM | 244                | 9                                        | <b>3.7%</b> | 168                                                   | 68.9%        | 67                                      | 27.5% |
| AMK | 244                | 8                                        | <b>3.3%</b> | 225                                                   | <b>92.2%</b> | 11                                      | 4.5%  |
| ATM | 253                | 8                                        | <b>3.2%</b> | 150                                                   | 59.3%        | 95                                      | 37.5% |
| TZP | 253                | 8                                        | <b>3.2%</b> | 229                                                   | <b>90.5%</b> | 16                                      | 6.3%  |
| IPM | 244                | 7                                        | <b>2.9%</b> | 144                                                   | 59.0%        | 93                                      | 38.1% |
| GEN | 244                | 7                                        | <b>2.9%</b> | 226                                                   | <b>92.6%</b> | 11                                      | 4.5%  |
| CRO | 244                | 6                                        | <b>2.5%</b> | 109                                                   | 44.7%        | 129                                     | 52.9% |
| TOB | 244                | 6                                        | <b>2.5%</b> | 162                                                   | 66.4%        | 76                                      | 31.1% |
| PIP | 253                | 5                                        | <b>2.0%</b> | 110                                                   | 43.5%        | 138                                     | 54.5% |
| CTT | 127                | 2                                        | 1.6%        | 50                                                    | 39.4%        | 75                                      | 59.1% |
| NIT | 127                | 2                                        | 1.6%        | 64                                                    | 50.4%        | 61                                      | 48.0% |
| ETP | 244                | 3                                        | 1.2%        | 72                                                    | 29.5%        | 169                                     | 69.3% |
| AMC | 136                | 0                                        | 0.0%        | 30                                                    | 22.1%        | 106                                     | 77.9% |
| CXM | 127                | 0                                        | 0.0%        | 34                                                    | 26.8%        | 93                                      | 73.2% |
| SAM | 136                | 0                                        | 0.0%        | 54                                                    | 39.7%        | 82                                      | 60.3% |
| AMP | 136                | 0                                        | 0.0%        | 69                                                    | 50.7%        | 67                                      | 49.3% |
| CZO | 127                | 0                                        | 0.0%        | 109                                                   | <b>85.8%</b> | 18                                      | 14.2% |

Abx: antibiotic, AMP: ampicillin, PIP: piperacillin, AMC: amoxicillin/clavulanic acid, SAM: ampicillin/sulbactam, TZP: piperacillin/tazobactam, CZO: cefazolin, CXM: cefuroxime, CAZ: ceftazidime, CRO: ceftriaxone, FEP: cefepime, CTT: cefotetan, ATM: aztreonam, ETP: ertapenem, IPM: imipenem, MEM: meropenem, AMK: amikacin, GEN: gentamicin, TOB: tobramycin, CIP: ciprofloxacin, LVX: levofloxacin, SXT: trimethoprim/sulfamethoxazole, NIT: nitrofurantoin

<sup>a</sup>Total number of individual susceptibility results of 3 ATCC strains reported by Microscan system.

<sup>b</sup>MIC outside reference range (failed QC).

<sup>c</sup>Susceptibility category not determinable when interpreted using CLSI 2017 document.

<sup>d</sup>MIC within reference range (passed QC).

Supplementary Table S8. Susceptibility Results of Quality Control Strains for Each Antibiotic Reported by Phoenix System as Interpreted by CLSI 2017.

| Abx | Total <sup>a</sup> | MIC outside Reference Range <sup>b</sup> |             | Susceptibility Category Not Determinable <sup>c</sup> |              | MIC within Reference Range <sup>d</sup> |       |
|-----|--------------------|------------------------------------------|-------------|-------------------------------------------------------|--------------|-----------------------------------------|-------|
|     |                    | No.                                      | %           | No.                                                   | %            | No.                                     | %     |
| FEP | 261                | 7                                        | <b>2.7%</b> | 238                                                   | <b>91.2%</b> | 16                                      | 6.1%  |
| SXT | 261                | 6                                        | <b>2.3%</b> | 132                                                   | 50.6%        | 123                                     | 47.1% |
| LVX | 261                | 6                                        | <b>2.3%</b> | 186                                                   | 71.3%        | 69                                      | 26.4% |
| CAZ | 261                | 6                                        | <b>2.3%</b> | 197                                                   | 75.5%        | 58                                      | 22.2% |
| CIP | 261                | 5                                        | <b>1.9%</b> | 237                                                   | <b>90.8%</b> | 19                                      | 7.3%  |
| ATM | 273                | 5                                        | <b>1.8%</b> | 168                                                   | 61.5%        | 100                                     | 36.6% |
| TZP | 273                | 5                                        | <b>1.8%</b> | 250                                                   | <b>91.6%</b> | 18                                      | 6.6%  |
| MEM | 261                | 4                                        | 1.5%        | 182                                                   | 69.7%        | 75                                      | 28.7% |
| CZO | 139                | 2                                        | 1.4%        | 129                                                   | <b>92.8%</b> | 8                                       | 5.8%  |
| CRO | 261                | 3                                        | 1.1%        | 134                                                   | 51.3%        | 124                                     | 47.5% |
| IPM | 261                | 3                                        | 1.1%        | 157                                                   | 60.2%        | 101                                     | 38.7% |
| AMK | 261                | 3                                        | 1.1%        | 244                                                   | <b>93.5%</b> | 14                                      | 5.4%  |
| GEN | 261                | 3                                        | 1.1%        | 251                                                   | <b>96.2%</b> | 7                                       | 2.7%  |
| PIP | 273                | 3                                        | 1.1%        | 129                                                   | 47.3%        | 141                                     | 51.6% |
| AMC | 151                | 0                                        | 0.0%        | 37                                                    | 24.5%        | 114                                     | 75.5% |
| SAM | 151                | 0                                        | 0.0%        | 60                                                    | 39.7%        | 91                                      | 60.3% |
| AMP | 151                | 0                                        | 0.0%        | 91                                                    | 60.3%        | 60                                      | 39.7% |

Abx: antibiotic, AMP: ampicillin, PIP: piperacillin, AMC: amoxicillin/clavulanic acid, SAM: ampicillin/sulbactam, TZP: piperacillin/tazobactam, CZO: cefazolin, CXM: cefuroxime, CAZ: ceftazidime, CRO: ceftriaxone, FEP: cefepime, CTT: cefotetan, ATM: aztreonam, ETP: ertapenem, IPM: imipenem, MEM: meropenem, AMK: amikacin, GEN: gentamicin, TOB: tobramycin, CIP: ciprofloxacin, LVX: levofloxacin, SXT: trimethoprim/sulfamethoxazole, NIT: nitrofurantoin

<sup>a</sup>Total number of individual susceptibility results of 3 ATCC strains reported by Phoenix system.

<sup>b</sup>MIC outside reference range (failed QC).

<sup>c</sup>Susceptibility category not determinable when interpreted using CLSI 2017 document.

<sup>d</sup>MIC within reference range (passed QC).



Supplementary Table S9. Antimicrobial Susceptibilities of two CARSS Strains (S1 and S2) by Broth Microdilution Method Performed at Three Central laboratories.

| Antibiotic | Breakpoints |        | S1    |                             | S2       |                             |
|------------|-------------|--------|-------|-----------------------------|----------|-----------------------------|
|            |             |        | MIC   | Susceptibility <sup>a</sup> | MIC      | Susceptibility <sup>a</sup> |
| AMP        | S<=8        | R>=32  | >256  | R                           | >256     | R                           |
| PIP        | S<=16       | R>=128 | >256  | R                           | >256     | R                           |
| AMC        | S<=8        | R>=32  | 8/4   | S                           | >256/128 | R                           |
| SAM        | S<=8        | R>=32  | 16/8  | I                           | >256     | R                           |
| TZP        | S<=16       | R>=128 | 2/4   | S                           | >256/4   | R                           |
| CZO        | S<=16       | R>=32  | >256  | R                           | >256     | R                           |
| CXM        | S<=8        | R>=32  | >256  | R                           | >256     | R                           |
| CAZ        | S<=4        | R>=16  | 1     | S                           | 16       | R                           |
| CRO        | S<=1        | R>=4   | >256  | R                           | >256     | R                           |
| FEP        | S<=2        | R>=16  | 2     | S                           | 16       | R                           |
| CTT        | S<=16       | R>=64  | 0.25  | S                           | 32       | I                           |
| ATM        | S<=4        | R>=16  | 2     | S                           | >256     | R                           |
| ETP        | S<=0.5      | R>=2   | 0.03  | S                           | 32       | R                           |
| IPM        | S<=1        | R>=4   | 0.25  | S                           | 16       | R                           |
| MEM        | S<=1        | R>=4   | 0.125 | S                           | 8        | R                           |
| AMK        | S<=16       | R>=64  | 4     | S                           | >256     | R                           |
| GEN        | S<=4        | R>=16  | 1     | S                           | >256     | R                           |
| TOB        | S<=4        | R>=16  | 1     | S                           | >256     | R                           |
| CIP        | S<=1        | R>=4   | 8     | R                           | 16       | R                           |
| LVX        | S<=2        | R>=8   | 8     | R                           | 16       | R                           |
| SXT        | S<=2        | R>=4   | >256  | R                           | >256     | R                           |
| NIT        | S<=32       | R>=128 | 16    | S                           | >256     | R                           |

AMP: ampicillin, PIP: piperacillin, AMC: amoxicillin/clavulanic acid, SAM: ampicillin/sulbactam, TZP: piperacillin/tazobactam, CZO: cefazolin, CXM: cefuroxime, CAZ: ceftazidime, CRO: ceftriaxone, FEP: cefepime, CTT: cefotetan, ATM: aztreonam, ETP: ertapenem, IPM: imipenem, MEM: meropenem, AMK: amikacin, GEN: gentamicin, TOB: tobramycin, CIP: ciprofloxacin, LVX: levofloxacin, SXT: trimethoprim/sulfamethoxazole, NIT: nitrofurantoin

Susceptibility<sup>a</sup>: Susceptibility category
